# Supplementary material for: Photocatalytic Inactivation of Co-Culture of E. coli and S. epidermidis Using APTES-Modified TiO2
Source: MDPI journal article supplement (doi:10.3390/molecules28041655), 2023-02-09
Supplement: s1 [file s1]

# Photocatalytic Inactivation of Co-Culture of *E. coli* and *S. epidermidis* using APTES-Modified TiO<sub>2</sub>

Paulina Rokicka-Konieczna <sup>1,2\*</sup>, Agnieszka Wanag <sup>1</sup>, Agnieszka Sienkiewicz <sup>1</sup>, Dylan Shun Izuma <sup>2</sup>, Ewa Ekiert <sup>1</sup>, Ewelina Kusiak-Nejman <sup>1</sup>, Chiaki Terashima <sup>2,3</sup>, Atsuo Yasumori <sup>4</sup>, Akira Fujishima <sup>3</sup> and Antoni W. Morawski <sup>1</sup>

<sup>1</sup>Department of Inorganic Chemical Technology and Environment Engineering, Faculty of Chemical Technology and Engineering, West Pomeranian University of Technology in Szczecin, Pułaskiego 10, 70-322 Szczecin, Poland;

<sup>2</sup> Department of Pure and Applied Chemistry, Faculty of Science and Technology, Tokyo University of Science, 2641 Yamazaki, Noda, Chiba 278-8510, Japan

<sup>3</sup> Research Center for Space System Innovation, Research Institute for Science and Technology, Tokyo University of Science, 2641 Yamazaki, Noda, Chiba 278-8510, Japan

<sup>4</sup> Department of Materials Science and Technology, Faculty of Advanced Engineering, Tokyo University of Science, 6-3-1 Niijuku, Katsushika-ku, Tokyo 125-8585, Japan

\* Correspondence: paulina.rokicka@zut.edu.pl

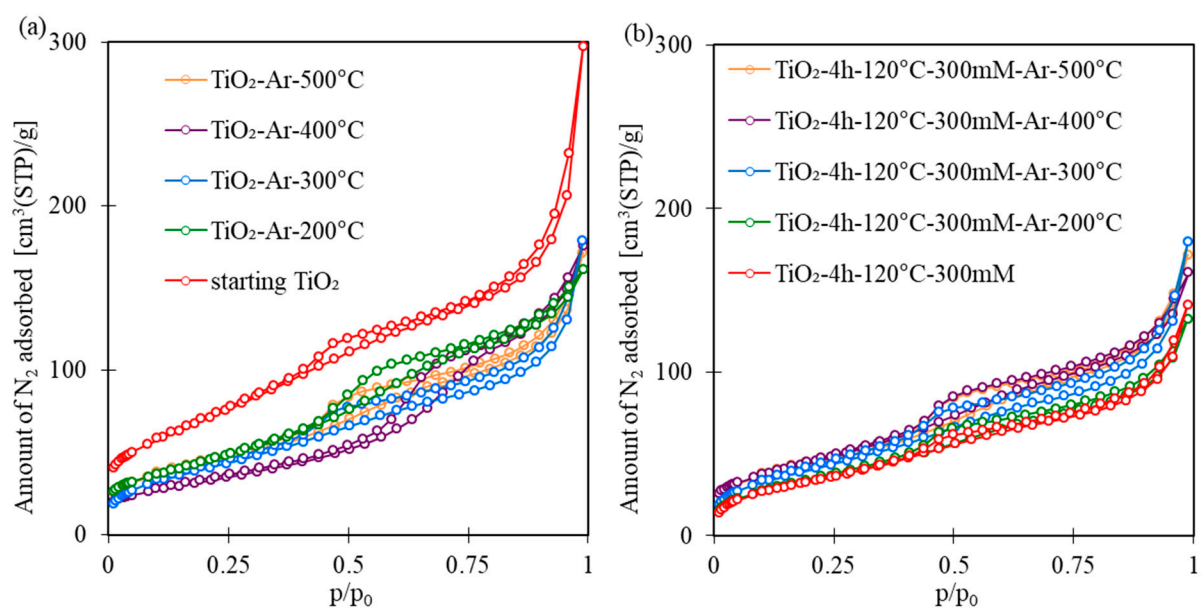

Figure S1. Adsorption-desorption isotherms of starting TiO<sub>2</sub>, reference calcined photocatalysts (a), and APTES/TiO<sub>2</sub> nanomaterials (b).

(a)

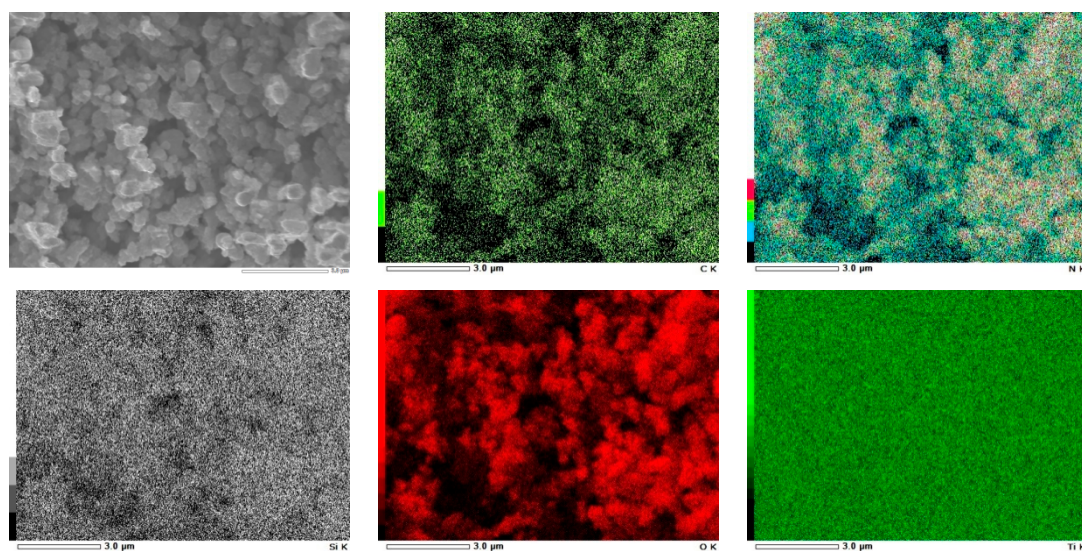

(b)

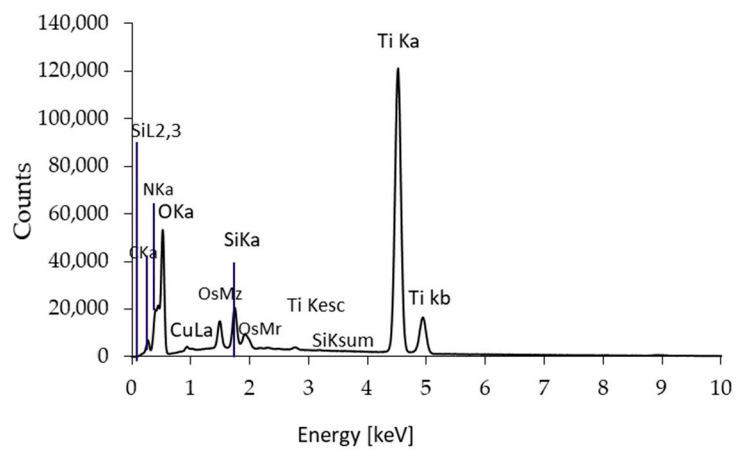

Figure S2. EDS mapping (a) and EDS spectrum (b) of  $\text{TiO}_2$ -4 h-120°C-300 mM

(a)

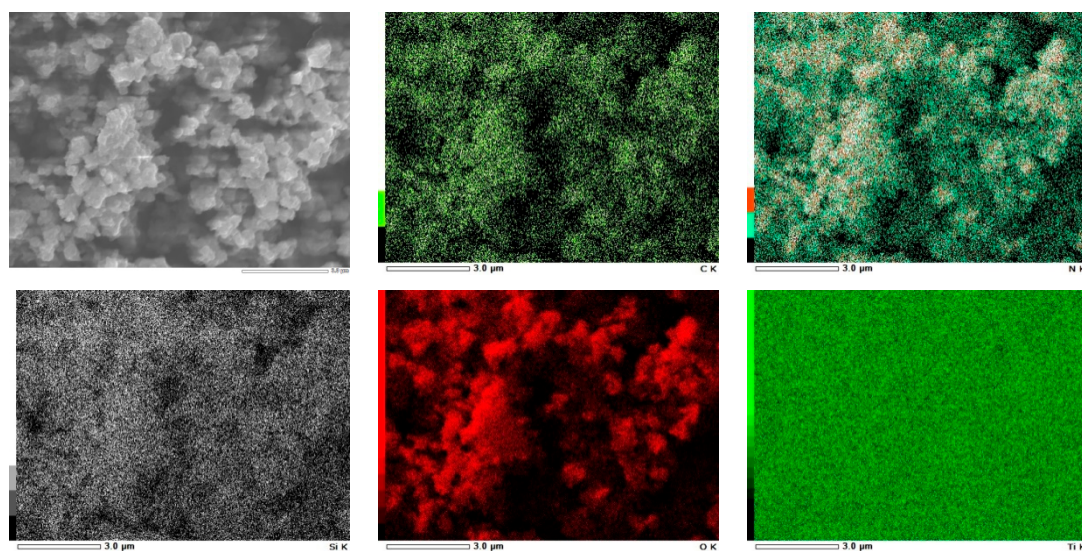

(b)

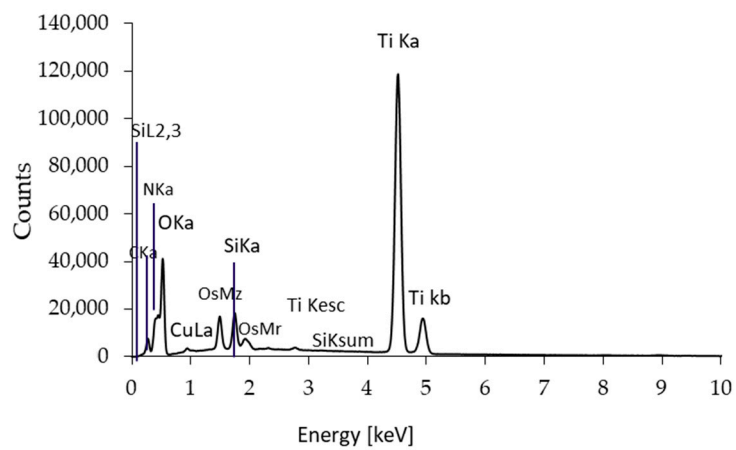

Figure S3. EDS mapping (a) and EDS spectrum (b) of TiO<sub>2</sub>-4 h-120°C-300 mM-Ar-200 °C.

(a)

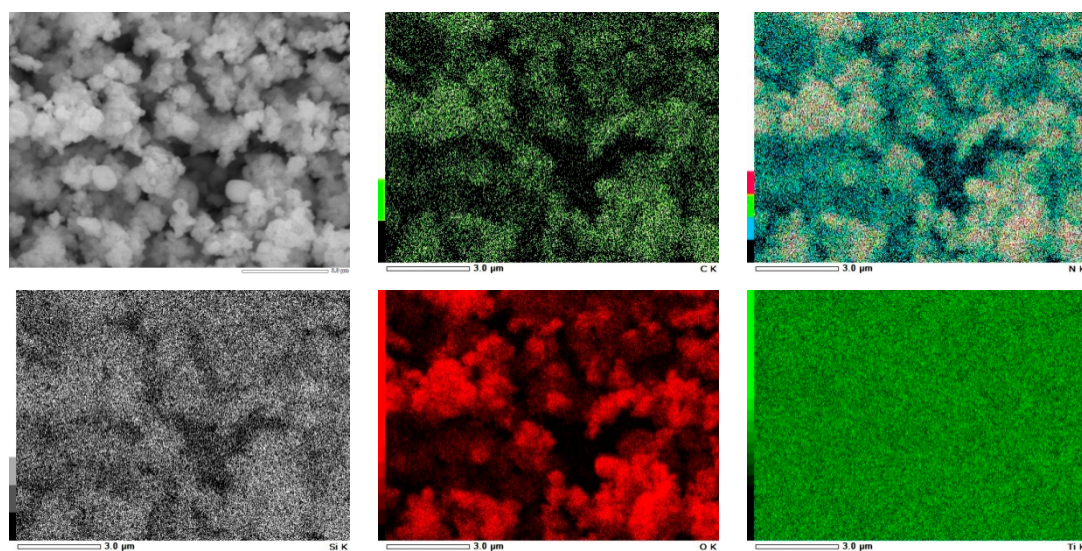

(b)

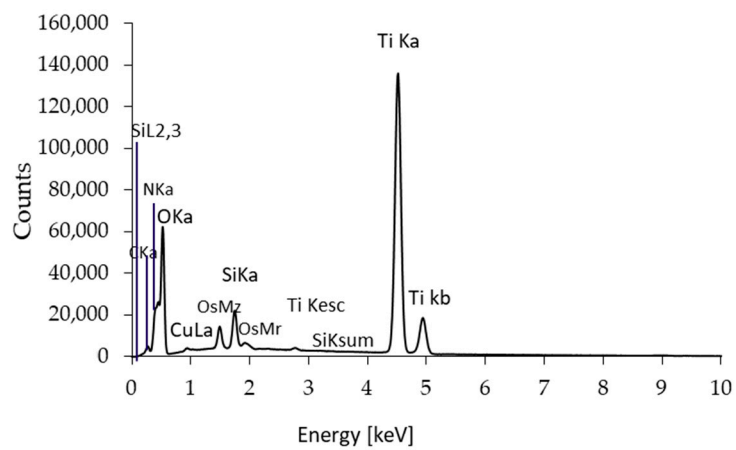

Figure S4. EDS mapping (a) and EDS spectrum (b) of  $\text{TiO}_2$ -4 h-120°C-300 mM-Ar-400 °C.



(a)

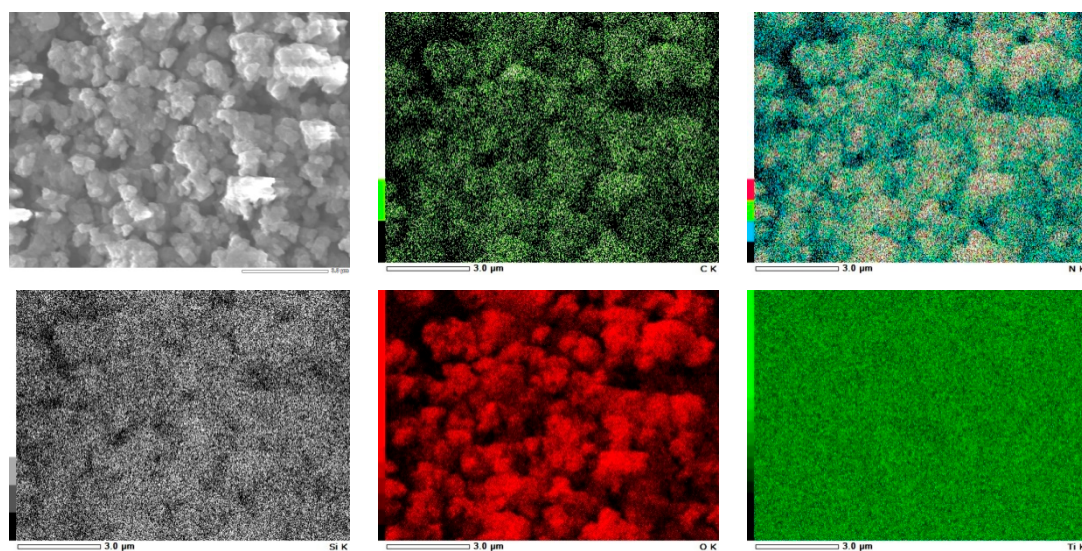

(b)

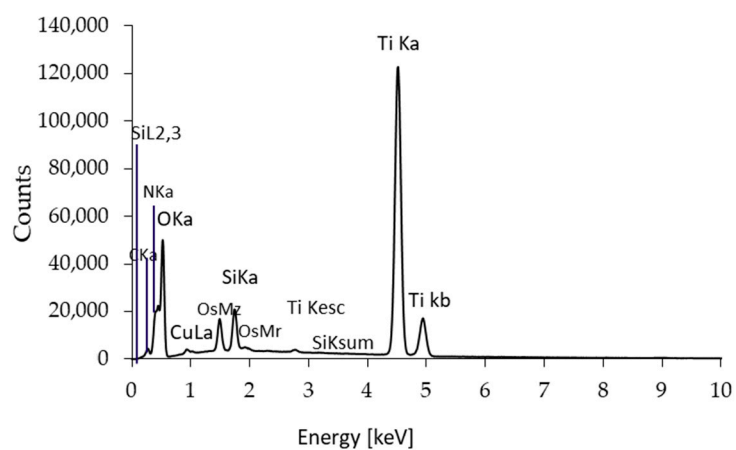

Figure S5. EDS mapping (a) and EDS spectrum (b) of TiO<sub>2</sub>-4 h-120°C-300 mM-Ar-500 °C.

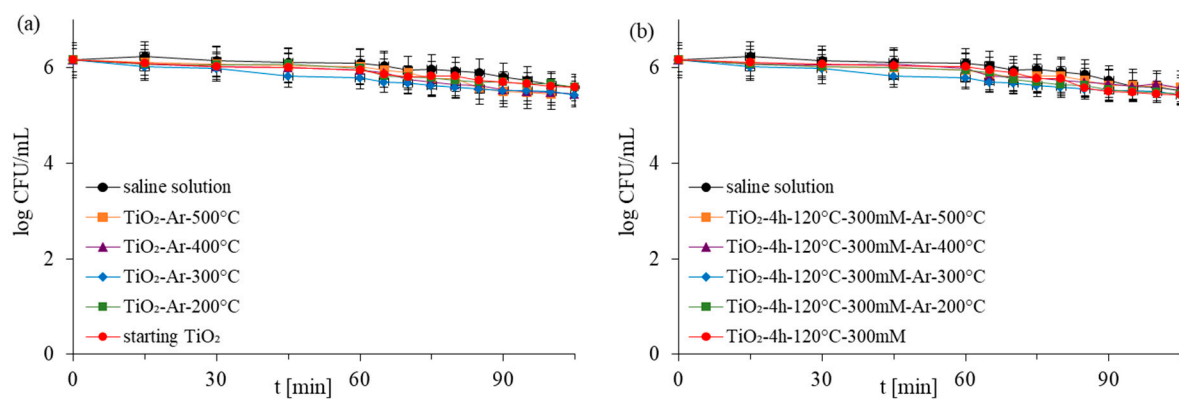

Figure S6. Inactivation of monoculture of *E. coli* in the presence of starting  $\text{TiO}_2$ , reference calcined photocatalysts (a) and APTES/ $\text{TiO}_2$  samples (b) under dark conditions.

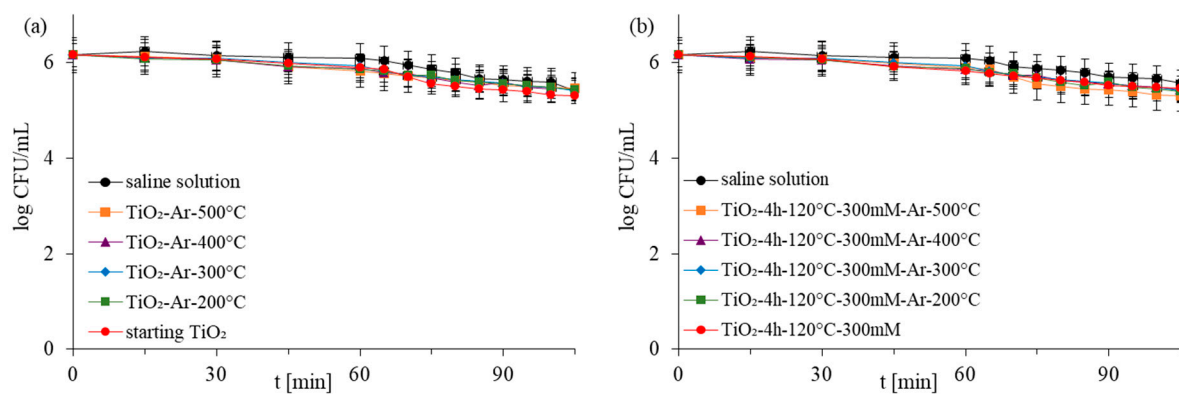

Figure S 7. Inactivation of monoculture of *S. epidermidis* in the presence of starting  $\text{TiO}_2$ , reference calcined photocatalysts (a) and APTES/ $\text{TiO}_2$  (b) samples under dark conditions.

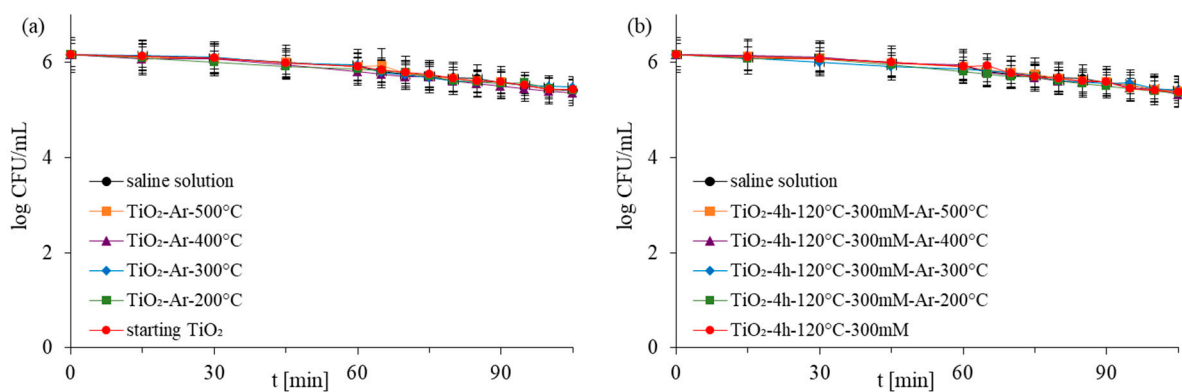

Figure S8. Inactivation of *E. coli* in co-culture bacteria in the presence of starting  $\text{TiO}_2$ , reference photocatalysts (a) and APTES/ $\text{TiO}_2$  (b) samples under dark conditions.

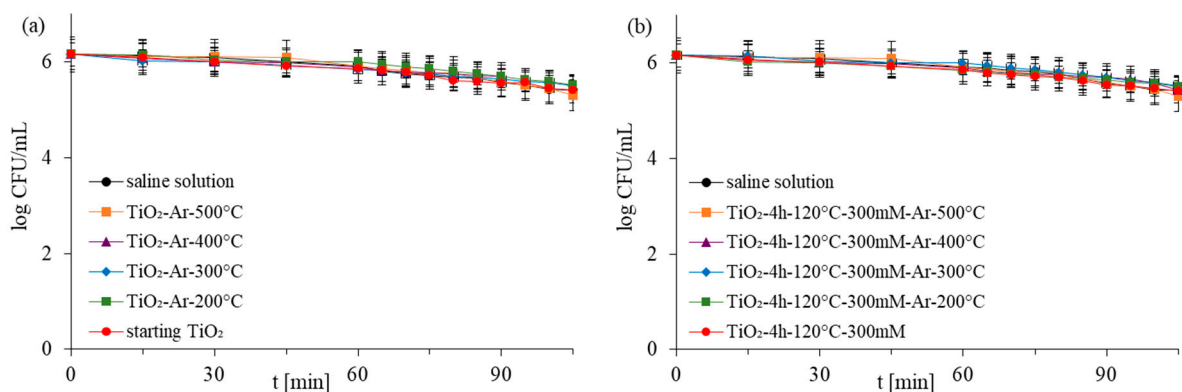

Figure S9. Inactivation of *S. epidermidis* in co-culture of bacteria in the presence of starting  $\text{TiO}_2$ , reference photocatalysts (a) and APTES/ $\text{TiO}_2$  samples (b) under dark conditions.

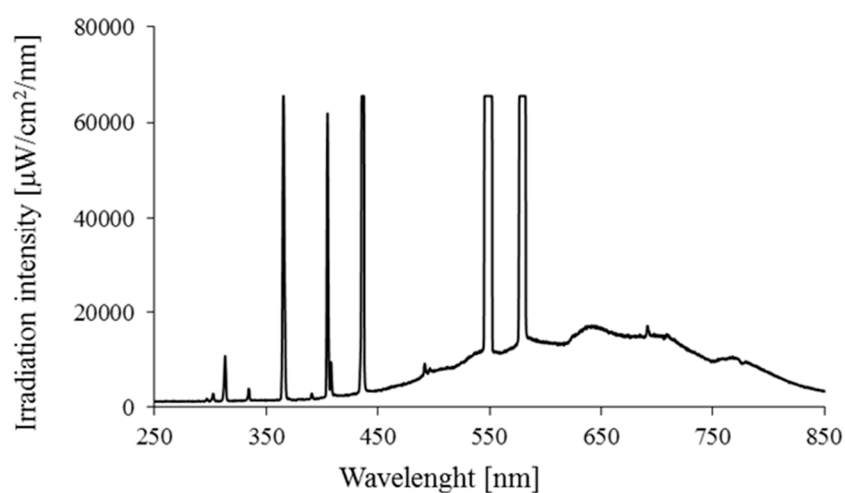

Figure S10. Emission spectra of artificial solar light (ASL).



The employed ASL source comprised a 300 W light bulb (OSRAM Ultra Vitalux, OSRAM GmbH, Munich, Germany) with a radiation intensity of  $9.0 \text{ W/m}^2$  in the spectral range from 300 to 2800 nm and  $258.1 \text{ W/m}^2$  in the spectral range from 280 to 380 nm.
